# Supplementary material
Source: Research Square preprint supplement (doi:10.21203/rs.3.rs-9205700/v1)
Supplement: Supplementary file 1 [file ab4705ab4013a99a421ecb05.docx]

## Appendices

#### Appendix 1: Global Commission Taxonomy

The taxonomy used for this RESSA is derived from The Global Evidence Commission report 2022, pp. 29-88

| **Decision-makers** | Government policymakers |
| --- | --- |
| Organisational leaders |
| Professionals |
| Citizens |
| **Hybrid decision-makers/ intermediaries** | Technical units within multilateral  organizations that support  member states |
| Domestic and global commissions |
| Government advisory bodies |
| Government science advice |
| Government evidence support |
| **Evidence intermediaries** | Fact-checking organizations |
| Science academies |
| Think tanks |
| Knowledge-translation platforms  (and knowledge brokers) |
| **Hybrid intermediaries/ producers** | Impact-oriented data-analytics  units |
| Impact-oriented modelling units |
| Impact-oriented evaluation units |
| Impact-oriented behavioural /  implementation research units |
| Impact-oriented qualitative insights  units |
| Impact-oriented evidence  synthesis units |
| Technology-assessment units |
| Guideline units |
| **Evidence producers** | Primary research |

#### Appendix 2: Social Network Analysis

| **Betweenness Centrality**  Betweenness centrality measures how many times an element lies on the shortest path between two other elements. In general, elements with high betweenness have more control over the flow of information and act as key bridges within the network. They can also be potential single points of failure. | | |
| --- | --- | --- |
| **RANK** | **Label** | **Value** |
|  | [Australian Health Research Alliance (AHRA) (VIC)](https://kumu.io/loomspider/=%20#elem-l56NVpqu) | 0.023 |
|  | [NHMRC HEAL National Research Network](https://kumu.io/loomspider/=%20#elem-BjcVp6H6) | 0.016 |
|  | [National Health and Medical Research Council (NHMRC)](https://kumu.io/loomspider/=%20#elem-CKHTHskw) | 0.016 |
|  | [Monash University](https://kumu.io/loomspider/=%20#elem-5oyNkzhQ) | 0.015 |
|  | [University of Sydney](https://kumu.io/loomspider/=%20#elem-4J2FCqcU) | 0.013 |
|  | [Australian Living Evidence Collaboration (ALEC)](https://kumu.io/loomspider/=%20#elem-fEf2Njwi) | 0.010 |
|  | [The Australian Prevention Partnership Centre](https://kumu.io/loomspider/=%20#elem-TqgK5o2Y) | 0.010 |
|  | [Western Alliance](https://kumu.io/loomspider/=%20#elem-ou8jrDYy) | 0.009 |
|  | [Better Health Channel](https://kumu.io/loomspider/=%20#elem-NwYMD62o) | 0.008 |
|  | [MDHS](https://kumu.io/loomspider/=%20#elem-BGH5xMbh) | 0.008 |
|  | [Centre for Healthy Brain Ageing (CHeBA)](https://kumu.io/loomspider/=%20#elem-23EAtiTT) | 0.008 |
|  | [Climate and Health Alliance (CAHA)](https://kumu.io/loomspider/=%20#elem-fArKvnc7) | 0.007 |
|  | [Global Centre for Preventive Health and Nutrition (GLOBE)](https://kumu.io/loomspider/=%20#elem-YUzGDpK8) | 0.007 |
|  | [Deakin University](https://kumu.io/loomspider/=%20#elem-e0R1ZpGr) | 0.007 |
|  | [Sector: Health Australian Government Organisations (Health and Aged Care Portfolio)](https://kumu.io/loomspider/=%20#elem-9mbOb3PP) | 0.006 |
|  | [Jean Hailes](https://kumu.io/loomspider/=%20#elem-OF1vMLRm) | 0.006 |
|  | [Sydney Health Partners](https://kumu.io/loomspider/=%20#elem-z6T63y4w) | 0.005 |
|  | [Association of Australian Medical Research Institutes (aamri)](https://kumu.io/loomspider/=%20#elem-iwg329UZ) | 0.005 |
|  | [The Westmead Institute](https://kumu.io/loomspider/=%20#elem-12GnlWzC) | 0.005 |
|  | [Cochrane Australia](https://kumu.io/loomspider/=%20#elem-xup3CatQ) | 0.005 |

| **Closeness Centrality**  Closeness measures the distance each element is from all other elements. In general, elements with high closeness can spread information to the rest of the network most easily and usually have high visibility into what is happening across the network. | | |
| --- | --- | --- |
| **RANK** | **Label** | **Value** |
|  | [Paul Ramsay Foundation](https://kumu.io/loomspider/=%20#elem-AVDfwFbx) | 0.249 |
|  | [Better Health Channel](https://kumu.io/loomspider/=%20#elem-NwYMD62o) | 0.226 |
|  | [CEI (Centre for Evidence and Implementation)](https://kumu.io/loomspider/=%20#elem-uRrs9Bs7) | 0.214 |
|  | [NHMRC HEAL National Research Network](https://kumu.io/loomspider/=%20#elem-BjcVp6H6) | 0.204 |
|  | [Association of Australian Medical Research Institutes (aamri)](https://kumu.io/loomspider/=%20#elem-iwg329UZ) | 0.202 |
|  | [The Australian Prevention Partnership Centre](https://kumu.io/loomspider/=%20#elem-TqgK5o2Y) | 0.189 |
|  | [The Sax Institute](https://kumu.io/loomspider/=%20#elem-PEIG6QmY) | 0.183 |
|  | [SAGE](https://kumu.io/loomspider/=%20#elem-QGVTa4FC) | 0.178 |
|  | [Australian Health Research Alliance (AHRA) (VIC)](https://kumu.io/loomspider/=%20#elem-l56NVpqu) | 0.175 |
|  | [Women's Health Research Translation and Impact Network (WHRTN)](https://kumu.io/loomspider/=%20#elem-kulXGFdy) | 0.174 |
|  | [Mitchell Institute](https://kumu.io/loomspider/=%20#elem-9JXRfVZd) | 0.171 |
|  | [Refresh Next Generation](https://kumu.io/loomspider/=%20#elem-vaDekZsY) | 0.170 |
|  | [Philanthropy Australia](https://kumu.io/loomspider/=%20#elem-mkHT1UGl) | 0.169 |
|  | [Collaboration for Enhanced Research Impact (CERI)](https://kumu.io/loomspider/=%20#elem-gOlaKIq0) | 0.169 |
|  | [Centre for Safe Air](https://kumu.io/loomspider/=%20#elem-WjBPPtTm) | 0.167 |
|  | [Centre for Research Excellence on Women and Non-communicable Diseases](https://kumu.io/loomspider/=%20#elem-NCtUskEB) | 0.166 |
|  | [Monash Centre for Health and Research Implementation (MCHRI)](https://kumu.io/loomspider/=%20#elem-OtXf8bB5) | 0.165 |
|  | [NPS MedicineWise](https://kumu.io/loomspider/=%20#elem-giUZkL8V) | 0.165 |
|  | [Australian Health Policy Collaboration (AHPC)](https://kumu.io/loomspider/=%20#elem-TOsIHTlc) | 0.165 |
|  | [Advancing Women in Healthcare Leadership](https://kumu.io/loomspider/=%20#elem-SwspK1FY) | 0.164 |

| **Degree Centrality**  Degree centrality is the simplest of the centrality metrics, counting the number of connections an element has. In general, elements with high degree are the local connectors / hubs, but aren't necessarily the best connected to the wider network. Degree can be adjusted using **connection weights**. When weighted, degree represents the total cost/value of an element's connections instead of just the count. | | |
| --- | --- | --- |
| **RANK** | **Label** | **Value** |
|  | [Paul Ramsay Foundation](https://kumu.io/loomspider/=%20#elem-AVDfwFbx) | 187 |
|  | [Better Health Channel](https://kumu.io/loomspider/=%20#elem-NwYMD62o) | 154 |
|  | [Climate and Health Alliance (CAHA)](https://kumu.io/loomspider/=%20#elem-fArKvnc7) | 98 |
|  | [The Sax Institute](https://kumu.io/loomspider/=%20#elem-PEIG6QmY) | 86 |
|  | [Rural Health Pro](https://kumu.io/loomspider/=%20#elem-keybibo8) | 77 |
|  | [Australian Living Evidence Collaboration (ALEC)](https://kumu.io/loomspider/=%20#elem-fEf2Njwi) | 69 |
|  | [The Australian Prevention Partnership Centre](https://kumu.io/loomspider/=%20#elem-TqgK5o2Y) | 62 |
|  | [Association of Australian Medical Research Institutes (aamri)](https://kumu.io/loomspider/=%20#elem-iwg329UZ) | 58 |
|  | [Australian Health Policy Collaboration (AHPC)](https://kumu.io/loomspider/=%20#elem-TOsIHTlc) | 55 |
|  | [CEI (Centre for Evidence and Implementation)](https://kumu.io/loomspider/=%20#elem-uRrs9Bs7) | 53 |
|  | [Monash University](https://kumu.io/loomspider/=%20#elem-5oyNkzhQ) | 43 |
|  | [F: Secondary non-statutory structure](https://kumu.io/loomspider/=%20#elem-3gSZkIVp) | 43 |
|  | [University of Newcastle](https://kumu.io/loomspider/=%20#elem-X11zjKai) | 41 |
|  | [NHMRC HEAL National Research Network](https://kumu.io/loomspider/=%20#elem-BjcVp6H6) | 41 |
|  | [E: Secondary statutory structure](https://kumu.io/loomspider/=%20#elem-E5iewJpu) | 41 |
|  | [Deafness Forum Australia](https://kumu.io/loomspider/=%20#elem-71T5XPEr) | 40 |
|  | [SAGE](https://kumu.io/loomspider/=%20#elem-QGVTa4FC) | 40 |
|  | [SOS Fracture Alliance](https://kumu.io/loomspider/=%20#elem-25ZQM50N) | 40 |
|  | [Melbourne Biomedical Precinct](https://kumu.io/loomspider/=%20#elem-8oEmH1k4) | 40 |
|  | [University of Sydney](https://kumu.io/loomspider/=%20#elem-4J2FCqcU) | 40 |

| **Outdegree**  Outdegree measures the number of outgoing connections for an element. In general, elements with high outdegree can reach a high number of elements and spark the flow of information across a network (but may not be the most efficient at spreading the information). | | |
| --- | --- | --- |
| **RANK** | **Label** | **Value** |
|  | [Paul Ramsay Foundation](https://kumu.io/loomspider/=%20#elem-AVDfwFbx) | 184 |
|  | [Better Health Channel](https://kumu.io/loomspider/=%20#elem-NwYMD62o) | 153 |
|  | [Climate and Health Alliance (CAHA)](https://kumu.io/loomspider/=%20#elem-fArKvnc7) | 94 |
|  | [The Sax Institute](https://kumu.io/loomspider/=%20#elem-PEIG6QmY) | 80 |
|  | [Rural Health Pro](https://kumu.io/loomspider/=%20#elem-keybibo8) | 77 |
|  | [Australian Living Evidence Collaboration (ALEC)](https://kumu.io/loomspider/=%20#elem-fEf2Njwi) | 65 |
|  | [Association of Australian Medical Research Institutes (aamri)](https://kumu.io/loomspider/=%20#elem-iwg329UZ) | 57 |
|  | [The Australian Prevention Partnership Centre](https://kumu.io/loomspider/=%20#elem-TqgK5o2Y) | 55 |
|  | [Australian Health Policy Collaboration (AHPC)](https://kumu.io/loomspider/=%20#elem-TOsIHTlc) | 54 |
|  | [CEI (Centre for Evidence and Implementation)](https://kumu.io/loomspider/=%20#elem-uRrs9Bs7) | 53 |
|  | [F: Secondary non-statutory structure](https://kumu.io/loomspider/=%20#elem-3gSZkIVp) | 42 |
|  | [E: Secondary statutory structure](https://kumu.io/loomspider/=%20#elem-E5iewJpu) | 40 |
|  | [Deafness Forum Australia](https://kumu.io/loomspider/=%20#elem-71T5XPEr) | 39 |
|  | [SAGE](https://kumu.io/loomspider/=%20#elem-QGVTa4FC) | 39 |
|  | [SOS Fracture Alliance](https://kumu.io/loomspider/=%20#elem-25ZQM50N) | 39 |
|  | [NHMRC HEAL National Research Network](https://kumu.io/loomspider/=%20#elem-BjcVp6H6) | 38 |
|  | [Melbourne Biomedical Precinct](https://kumu.io/loomspider/=%20#elem-8oEmH1k4) | 38 |
|  | [John Curtin School of Medical Research](https://kumu.io/loomspider/=%20#elem-fcIj2K3F) | 37 |
|  | [NPS MedicineWise](https://kumu.io/loomspider/=%20#elem-giUZkL8V) | 34 |
|  | [OMICO](https://kumu.io/loomspider/=%20#elem-re5Iv231) | 31 |

| **Indegree**  Indegree measures the number of incoming connections for an element. In general, elements with high indegree are the leaders, looked to by others as a source of advice, expertise, or information. | | |
| --- | --- | --- |
| **RANK** | **Label** | **Value** |
|  | [Monash University](https://kumu.io/loomspider/=%20#elem-5oyNkzhQ) | 34 |
|  | [University of Sydney](https://kumu.io/loomspider/=%20#elem-4J2FCqcU) | 25 |
|  | [University of Melbourne](https://kumu.io/loomspider/=%20#elem-pN8arN9j) | 21 |
|  | [Deakin University](https://kumu.io/loomspider/=%20#elem-e0R1ZpGr) | 18 |
|  | [University of Queensland](https://kumu.io/loomspider/=%20#elem-so5Ie7wF) | 18 |
|  | [UNSW Sydney](https://kumu.io/loomspider/=%20#elem-KiIvaN7W) | 17 |
|  | [University of Newcastle](https://kumu.io/loomspider/=%20#elem-X11zjKai) | 16 |
|  | [Flinders University](https://kumu.io/loomspider/=%20#elem-UfuVDiH7) | 15 |
|  | [Healthdirect Australia](https://kumu.io/loomspider/=%20#elem-OaIaLwrB) | 15 |
|  | [Griffith University](https://kumu.io/loomspider/=%20#elem-BXLNpaFz) | 13 |
|  | [Centre for Healthy Brain Ageing (CHeBA)](https://kumu.io/loomspider/=%20#elem-23EAtiTT) | 13 |
|  | [University of Technology, Sydney](https://kumu.io/loomspider/=%20#elem-GMJSKOKV) | 12 |
|  | [Curtin University](https://kumu.io/loomspider/=%20#elem-GPf3cW2P) | 11 |
|  | [University of Western Australia](https://kumu.io/loomspider/=%20#elem-tdjWmw5x) | 11 |
|  | [La Trobe](https://kumu.io/loomspider/=%20#elem-AHsGTYCe) | 11 |
|  | [National Health and Medical Research Council (NHMRC)](https://kumu.io/loomspider/=%20#elem-CKHTHskw) | 11 |
|  | [The George Institute for Global Health](https://kumu.io/loomspider/=%20#elem-RQmjO8HP) | 11 |
|  | [Macquarie University](https://kumu.io/loomspider/=%20#elem-MmsPpabk) | 10 |
|  | [Menzies School of Health Research](https://kumu.io/loomspider/=%20#elem-NWgI65yd) | 10 |
|  | [Royal Australasian College of Physicians (RACP) (NSW)](https://kumu.io/loomspider/=%20#elem-2HVwfm0B) | 10 |

| **Reach (two-step out)**  Reach measures the portion of the network within two steps of an element. In general, elements with high reach can spread information through the network through close friend-of-a-friend contacts. | | |
| --- | --- | --- |
| **RANK** | **Label** | **Value** |
|  | [NHMRC HEAL National Research Network](https://kumu.io/loomspider/=%20#elem-BjcVp6H6) | 0.167 |
|  | [CEI (Centre for Evidence and Implementation)](https://kumu.io/loomspider/=%20#elem-uRrs9Bs7) | 0.165 |
|  | [Paul Ramsay Foundation](https://kumu.io/loomspider/=%20#elem-AVDfwFbx) | 0.143 |
|  | [Better Health Channel](https://kumu.io/loomspider/=%20#elem-NwYMD62o) | 0.116 |
|  | [Association of Australian Medical Research Institutes (aamri)](https://kumu.io/loomspider/=%20#elem-iwg329UZ) | 0.109 |
|  | [Mitchell Institute](https://kumu.io/loomspider/=%20#elem-9JXRfVZd) | 0.104 |
|  | [Philanthropy Australia](https://kumu.io/loomspider/=%20#elem-mkHT1UGl) | 0.101 |
|  | [The Australian Prevention Partnership Centre](https://kumu.io/loomspider/=%20#elem-TqgK5o2Y) | 0.091 |
|  | [Australian Health Promotion Association](https://kumu.io/loomspider/=%20#elem-RnCcTADW) | 0.090 |
|  | [SAGE](https://kumu.io/loomspider/=%20#elem-QGVTa4FC) | 0.088 |
|  | [Climate and Health Alliance (CAHA)](https://kumu.io/loomspider/=%20#elem-fArKvnc7) | 0.088 |
|  | [The Sax Institute](https://kumu.io/loomspider/=%20#elem-PEIG6QmY) | 0.084 |
|  | [MDHS](https://kumu.io/loomspider/=%20#elem-BGH5xMbh) | 0.083 |
|  | [Australian Living Evidence Collaboration (ALEC)](https://kumu.io/loomspider/=%20#elem-fEf2Njwi) | 0.082 |
|  | [Refresh Next Generation](https://kumu.io/loomspider/=%20#elem-vaDekZsY) | 0.077 |
|  | [Australian Health Research Alliance (AHRA) (VIC)](https://kumu.io/loomspider/=%20#elem-l56NVpqu) | 0.077 |
|  | [Women's Health Research Translation and Impact Network (WHRTN)](https://kumu.io/loomspider/=%20#elem-kulXGFdy) | 0.076 |
|  | [Global Centre for Preventive Health and Nutrition (GLOBE)](https://kumu.io/loomspider/=%20#elem-YUzGDpK8) | 0.071 |
|  | [Rural Health Pro](https://kumu.io/loomspider/=%20#elem-keybibo8) | 0.067 |
|  | [Australasian Nursing and Midwifery Clinical Trials Network (ANMCTN)](https://kumu.io/loomspider/=%20#elem-ZcffgO2q) | 0.064 |

| **Reach Efficiency (two-step out)**  Reach efficiency normalizes reach by dividing it by size (number of neighbours). In general, elements with high reach efficiency are less connected but gain more exposure through each direct relationship. | | |
| --- | --- | --- |
| **RANK** | **Label** | **Value** |
|  | [Philanthropy Australia](https://kumu.io/loomspider/=%20#elem-mkHT1UGl) | 0.051 |
|  | [Greening the Healthcare Sector Think Tank](https://kumu.io/loomspider/=%20#elem-Z35wlz4R) | 0.026 |
|  | [Mitchell Institute](https://kumu.io/loomspider/=%20#elem-9JXRfVZd) | 0.021 |
|  | [Secure Unified Research Environment (SURE)](https://kumu.io/loomspider/=%20#elem-3mVKwTF0) | 0.014 |
|  | [MDHS](https://kumu.io/loomspider/=%20#elem-BGH5xMbh) | 0.014 |
|  | [Central Australia Rural Practitioners Association (CARPA)](https://kumu.io/loomspider/=%20#elem-RumdWguY) | 0.013 |
|  | [Cochrane Evidence Synthesis Unit (CESU) Australia](https://kumu.io/loomspider/=%20#elem-eyTZEk2C) | 0.010 |
|  | [Secondary Structures](https://kumu.io/loomspider/=%20#elem-hz7Z0YGR) | 0.009 |
|  | [Australian Music Therapy Association](https://kumu.io/loomspider/=%20#elem-e1Y8pbQT) | 0.009 |
|  | [Centre of Excellence Treatable Traits](https://kumu.io/loomspider/=%20#elem-a0NlmK4l) | 0.007 |
|  | [Refresh Next Generation](https://kumu.io/loomspider/=%20#elem-vaDekZsY) | 0.007 |
|  | [Centre of Research Excellence for Venom and Antivenom](https://kumu.io/loomspider/=%20#elem-mTcdSpbp) | 0.007 |
|  | [Mobility & Accessibility for Children & Adults (MACA)](https://kumu.io/loomspider/=%20#elem-hHCwytAB) | 0.007 |
|  | [Global Centre for Preventive Health and Nutrition (GLOBE)](https://kumu.io/loomspider/=%20#elem-YUzGDpK8) | 0.006 |
|  | [The Westmead Institute](https://kumu.io/loomspider/=%20#elem-12GnlWzC) | 0.006 |
|  | [Health Research Institute](https://kumu.io/loomspider/=%20#elem-zyKiRjYE) | 0.006 |
|  | [Centre for Research Excellence on Women and Non-communicable Diseases](https://kumu.io/loomspider/=%20#elem-NCtUskEB) | 0.005 |
|  | [Women's Health Research Translation and Impact Network (WHRTN)](https://kumu.io/loomspider/=%20#elem-kulXGFdy) | 0.005 |
|  | [The Royal Melbourne Hospital](https://kumu.io/loomspider/=%20#elem-hc2ZClxM) | 0.005 |
|  | [National Drug Research Institute (NDRI)](https://kumu.io/loomspider/=%20#elem-GQlA04yN) | 0.005 |

| **Eigenvector Centrality**  Eigenvector centrality measures how well connected an element is to other well connected elements. In general, elements with high eigenvector centrality are the leaders of the network, though they may not have the strongest local influence. | | |
| --- | --- | --- |
| **RANK** | **Label** | **Value** |
|  | [Monash University](https://kumu.io/loomspider/=%20#elem-5oyNkzhQ) | 0.0132 |
|  | [Australian Health Research Alliance (AHRA) (VIC)](https://kumu.io/loomspider/=%20#elem-l56NVpqu) | 0.0108 |
|  | [Deakin University](https://kumu.io/loomspider/=%20#elem-e0R1ZpGr) | 0.0105 |
|  | [National Health and Medical Research Council (NHMRC)](https://kumu.io/loomspider/=%20#elem-CKHTHskw) | 0.0103 |
|  | [University of Sydney](https://kumu.io/loomspider/=%20#elem-4J2FCqcU) | 0.0102 |
|  | [UNSW Sydney](https://kumu.io/loomspider/=%20#elem-KiIvaN7W) | 0.0097 |
|  | [The George Institute for Global Health](https://kumu.io/loomspider/=%20#elem-RQmjO8HP) | 0.0081 |
|  | [Menzies School of Health Research](https://kumu.io/loomspider/=%20#elem-NWgI65yd) | 0.0080 |
|  | [University of Queensland](https://kumu.io/loomspider/=%20#elem-so5Ie7wF) | 0.0075 |
|  | [University of Newcastle](https://kumu.io/loomspider/=%20#elem-X11zjKai) | 0.0075 |
|  | [University of Melbourne](https://kumu.io/loomspider/=%20#elem-pN8arN9j) | 0.0075 |
|  | [Centre for Healthy Brain Ageing (CHeBA)](https://kumu.io/loomspider/=%20#elem-23EAtiTT) | 0.0075 |
|  | [MSDI Evidence Review Service](https://kumu.io/loomspider/=%20#elem-ARzkWAJT) | 0.0068 |
|  | [The Australian Prevention Partnership Centre](https://kumu.io/loomspider/=%20#elem-TqgK5o2Y) | 0.0066 |
|  | [(NCOIS) National Centre of Implementation Science](https://kumu.io/loomspider/=%20#elem-RpdFLLzO) | 0.0063 |
|  | [Griffith University](https://kumu.io/loomspider/=%20#elem-BXLNpaFz) | 0.0059 |
|  | [Australian Living Evidence Collaboration (ALEC)](https://kumu.io/loomspider/=%20#elem-fEf2Njwi) | 0.0059 |
|  | [Adelaide University](https://kumu.io/loomspider/=%20#elem-Dl7ay6Qa) | 0.0049 |
|  | [Centre of Research Excellence Tobacco Endgame](https://kumu.io/loomspider/=%20#elem-GJEcMQ5M) | 0.0049 |
|  | [Cochrane Australia](https://kumu.io/loomspider/=%20#elem-xup3CatQ) | 0.0049 |

| **MICMAC** is a system analysis that explores element exposure (how much a given element is affected by other elements) and influence (how much a given element affects other elements). When plotted on an XY axis, these scores help you identify potential leverage points within the overall system. |
| --- |

| **MICMAC Cross Impact Analysis (Exposure)** | | |
| --- | --- | --- |
| **RANK** | **Label** | **Value** |
|  | [Medical Women's Society of NSW](https://kumu.io/loomspider/=%20#elem-CWGcWuzm) | 1 |
|  | [Medical Women's Society ACT & Region](https://kumu.io/loomspider/=%20#elem-QF9RiTZC) | 1 |
|  | [University of Melbourne](https://kumu.io/loomspider/=%20#elem-pN8arN9j) | 0.992 |
|  | [Lotterywest](https://kumu.io/loomspider/=%20#elem-Tdz9eWZa) | 0.983 |
|  | [Health Roundtable (HRT)](https://kumu.io/loomspider/=%20#elem-mWEJ6Kl7) | 0.980 |
|  | [Lions Eye Institute](https://kumu.io/loomspider/=%20#elem-9wpoKV9R) | 0.965 |
|  | [Medicines Australia](https://kumu.io/loomspider/=%20#elem-a0HERIVz) | 0.960 |
|  | [The Children's Hospital at Westmead](https://kumu.io/loomspider/=%20#elem-YNhI9dbH) | 0.950 |
|  | [Thoracic Society of Australia and New Zealand (TSANZ)](https://kumu.io/loomspider/=%20#elem-WgjdIlIo) | 0.950 |
|  | [NSW Government Northern Sydney Health District](https://kumu.io/loomspider/=%20#elem-LxBhE0sA) | 0.950 |
|  | [Griffith Health Institute](https://kumu.io/loomspider/=%20#elem-6hKaEH7U) | 0.949 |
|  | [360Edge](https://kumu.io/loomspider/=%20#elem-NN39uFbx) | 0.948 |
|  | [School of Public Health and Preventive Medicine](https://kumu.io/loomspider/=%20#elem-tKQDKdDO) | 0.948 |
|  | [Sunshine Coast Health Institute](https://kumu.io/loomspider/=%20#elem-M7MmKkrf) | 0.948 |
|  | [Hardwickes (ACT)](https://kumu.io/loomspider/=%20#elem-jPMIbxAp) | 0.940 |
|  | [Norton Rose Fulbright (NSW)](https://kumu.io/loomspider/=%20#elem-pD16rEm2) | 0.940 |
|  | [Murdoch University](https://kumu.io/loomspider/=%20#elem-XcFfkRUH) | 0.939 |
|  | [Healthdirect Australia](https://kumu.io/loomspider/=%20#elem-OaIaLwrB) | 0.938 |
|  | [Women's Health Research Translation and Impact Network (WHRTN)](https://kumu.io/loomspider/=%20#elem-kulXGFdy) | 0.936 |
|  | [Osteopathy Australia](https://kumu.io/loomspider/=%20#elem-TNrrAMfm) | 0.934 |

| **MICMAC Cross Impact Analysis (Influence)** | | |
| --- | --- | --- |
| **RANK** | **Label** | **Value** |
|  | [Hearing Health Sector Alliance (HHSA)](https://kumu.io/loomspider/=%20#elem-el4inJKC) | 1 |
|  | [Australian Health Policy Collaboration (AHPC)](https://kumu.io/loomspider/=%20#elem-TOsIHTlc) | 0.993 |
|  | [The Australian Prevention Partnership Centre](https://kumu.io/loomspider/=%20#elem-TqgK5o2Y) | 0.991 |
|  | [Institute for Musculoskeletal Health](https://kumu.io/loomspider/=%20#elem-dpe5NqS3) | 0.955 |
|  | [Chris O'Brien Lifehouse](https://kumu.io/loomspider/=%20#elem-qhbNB7w2) | 0.955 |
|  | [NHMRC Clinical Trials Centre (University of Sydney)](https://kumu.io/loomspider/=%20#elem-OfO0e0ER) | 0.955 |
|  | [Centenary Institute Life Saving Research](https://kumu.io/loomspider/=%20#elem-fjY7FBts) | 0.955 |
|  | [Kolling Institute](https://kumu.io/loomspider/=%20#elem-wysAbiOw) | 0.955 |
|  | [Asbestos and Dust Diseases Research Institute (ADDRI)](https://kumu.io/loomspider/=%20#elem-cTxMCcMV) | 0.955 |
|  | [University Centre for Rural Health](https://kumu.io/loomspider/=%20#elem-lJ9U3LRF) | 0.955 |
|  | [SAGE](https://kumu.io/loomspider/=%20#elem-QGVTa4FC) | 0.954 |
|  | [Quality Assurance for Aboriginal & Torres Straight Islander Medical Services (QAAMS)](https://kumu.io/loomspider/=%20#elem-wrx1NqOy) | 0.948 |
|  | [Australian Living Evidence Collaboration (ALEC)](https://kumu.io/loomspider/=%20#elem-fEf2Njwi) | 0.946 |
|  | [Plus Alliance](https://kumu.io/loomspider/=%20#elem-xugd11bt) | 0.943 |
|  | [Bionics Institute](https://kumu.io/loomspider/=%20#elem-EjzahHMO) | 0.943 |
|  | [Centre for Social Impact (NSW)](https://kumu.io/loomspider/=%20#elem-5tsmFRo5) | 0.943 |
|  | [Monash Centre for Health and Research Implementation (MCHRI)](https://kumu.io/loomspider/=%20#elem-OtXf8bB5) | 0.939 |
|  | [The Fred Hollows Foundation](https://kumu.io/loomspider/=%20#elem-04TJTfjR) | 0.939 |
|  | [The Westmead Institute](https://kumu.io/loomspider/=%20#elem-12GnlWzC) | 0.937 |
|  | [Therapeutic Innovation Australia](https://kumu.io/loomspider/=%20#elem-SjdB5a6O) | 0.936 |
